# Supplementary material for: Theoretically Guided Iterative Design of the Sense2Quit App for Tobacco Cessation in Persons Living with HIV
Source: MDPI journal article supplement (doi:10.3390/ijerph20054219), 2023-02-27
Supplement: s1 [file s1]

# Sense2Quit

---

APP DESIGN SESSION 1.0

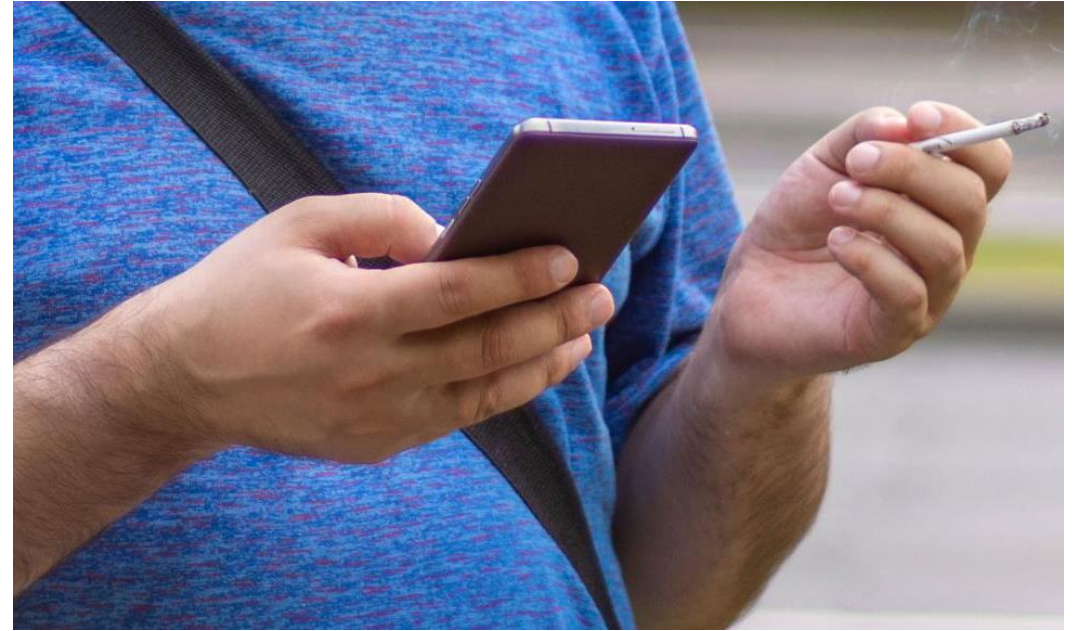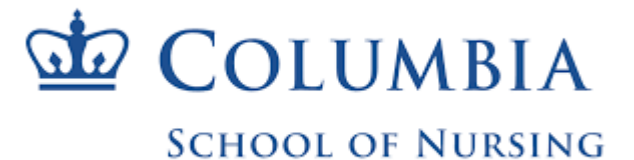

# Overview

---

**Purpose:** To create a highly usable and relevant mobile app for people living with HIV (PLWH) who smoke and want to quit smoking

2 Design Sessions: 1.0 (Optimal Features) and 2.0 (Interface)

- Today is Design Session 1.0

**Goal 1.0:** Identify features for the mobile app based on the information provided by earlier focus groups

- Content, features, and functions

If you had an app to help you quit smoking,

What messages would stop you from smoking a cigarette?

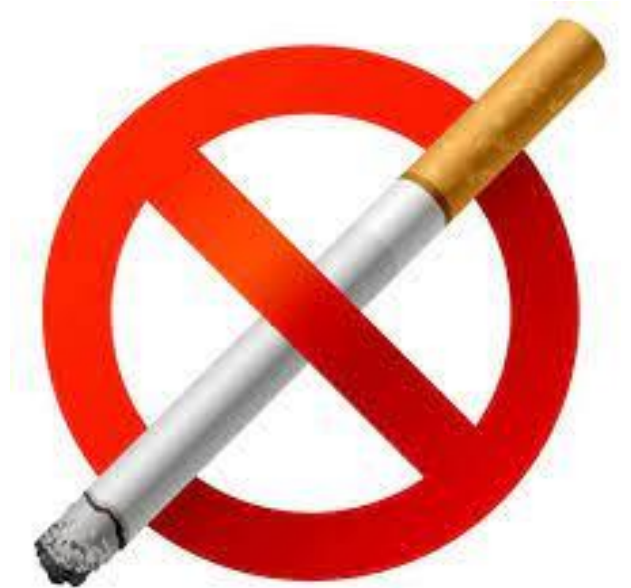

**Please refer to your handout  
for the next 5 categories**

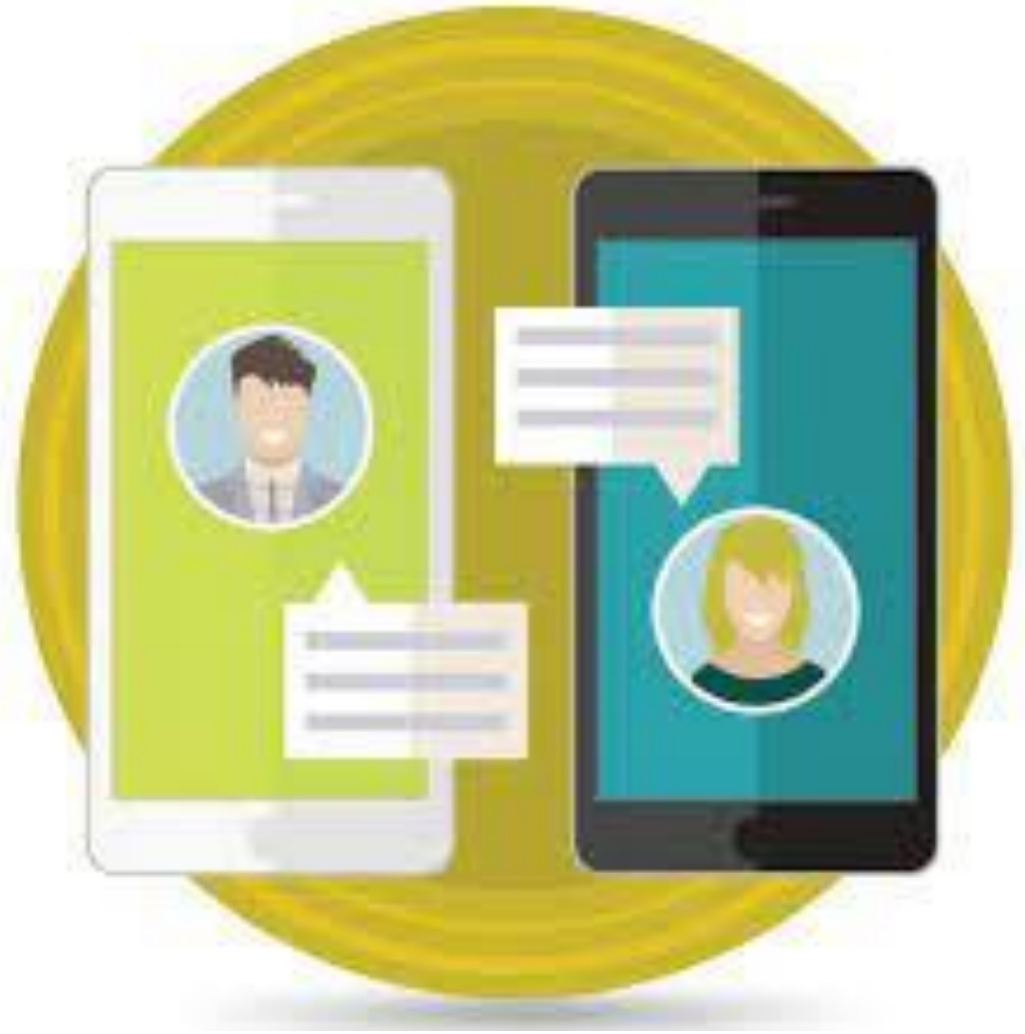

# Category #1: Chat Function

---

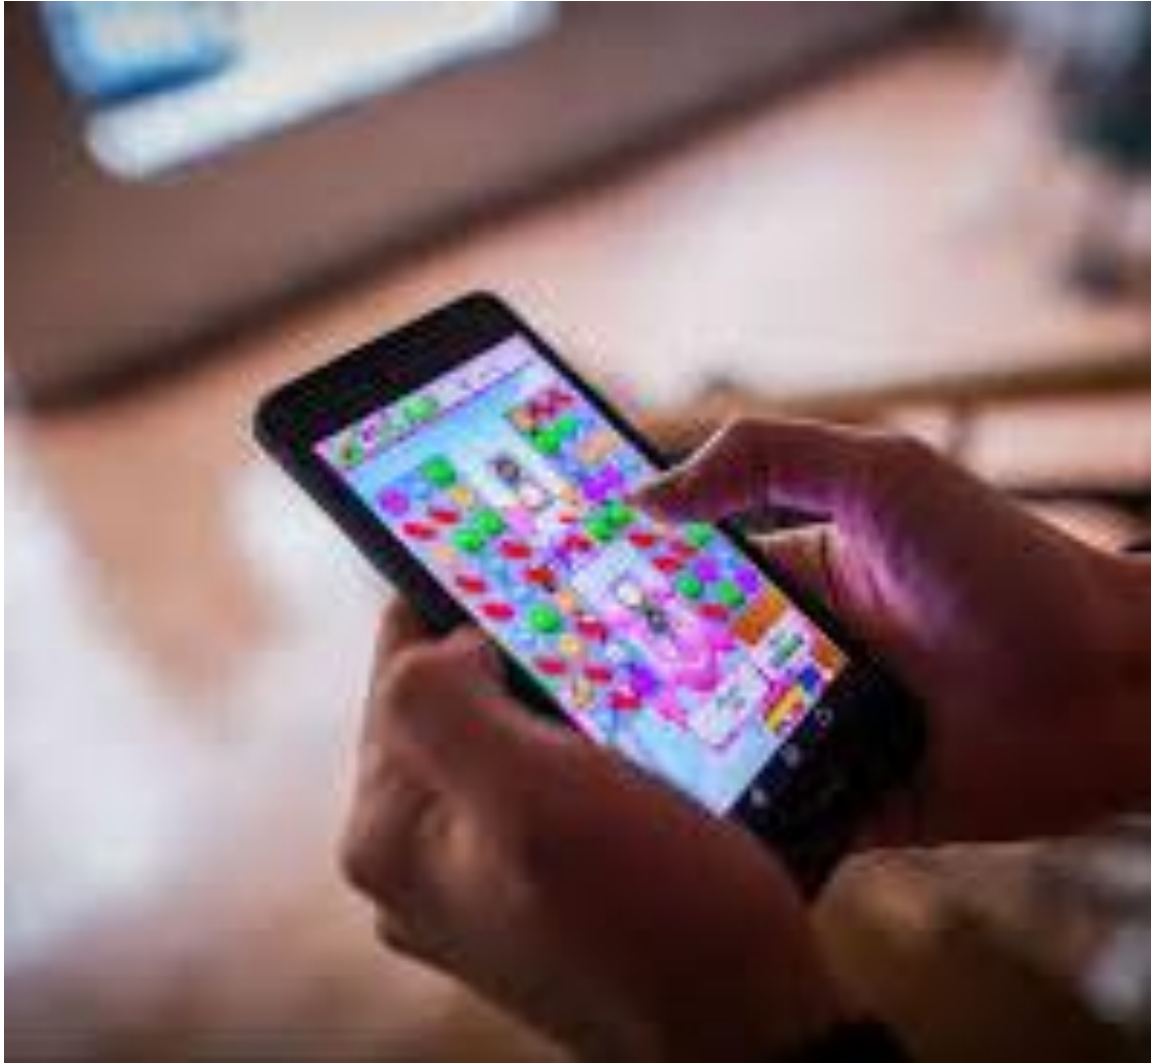

## Category #2: Games

---

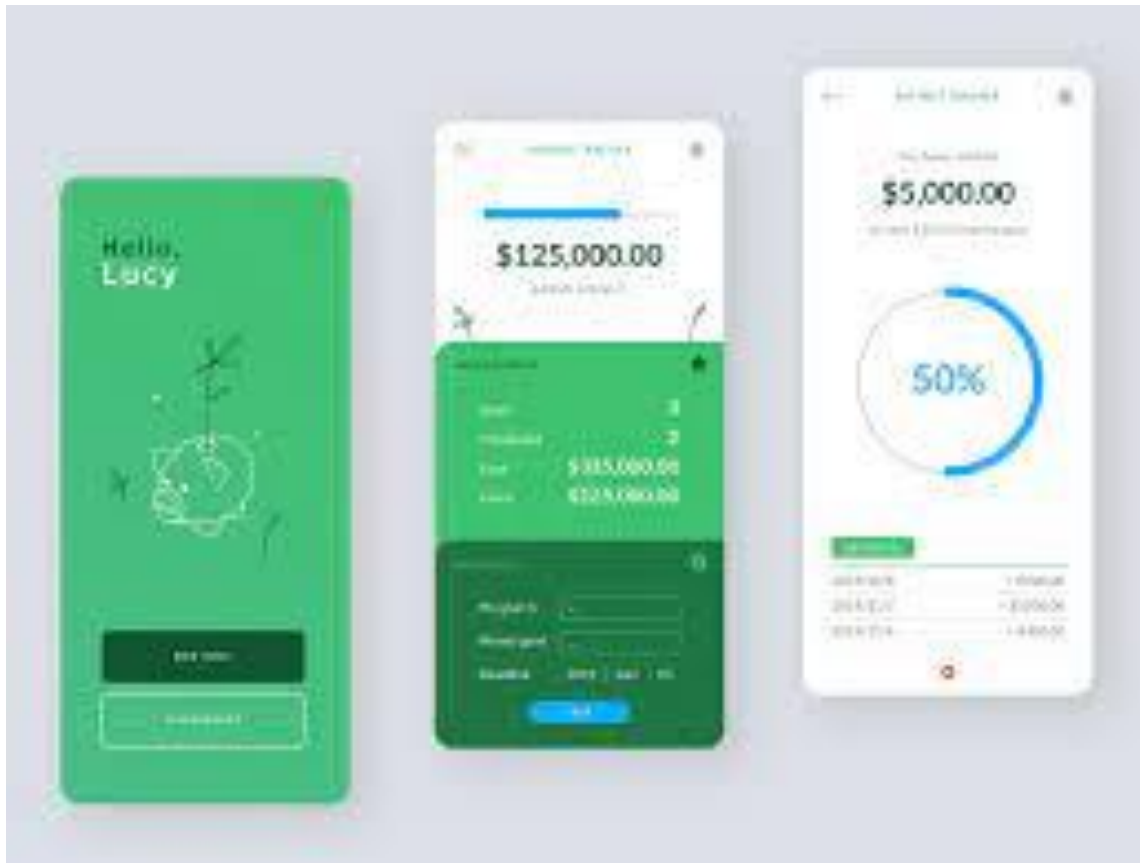

# Category #3: Savings Tracker

---

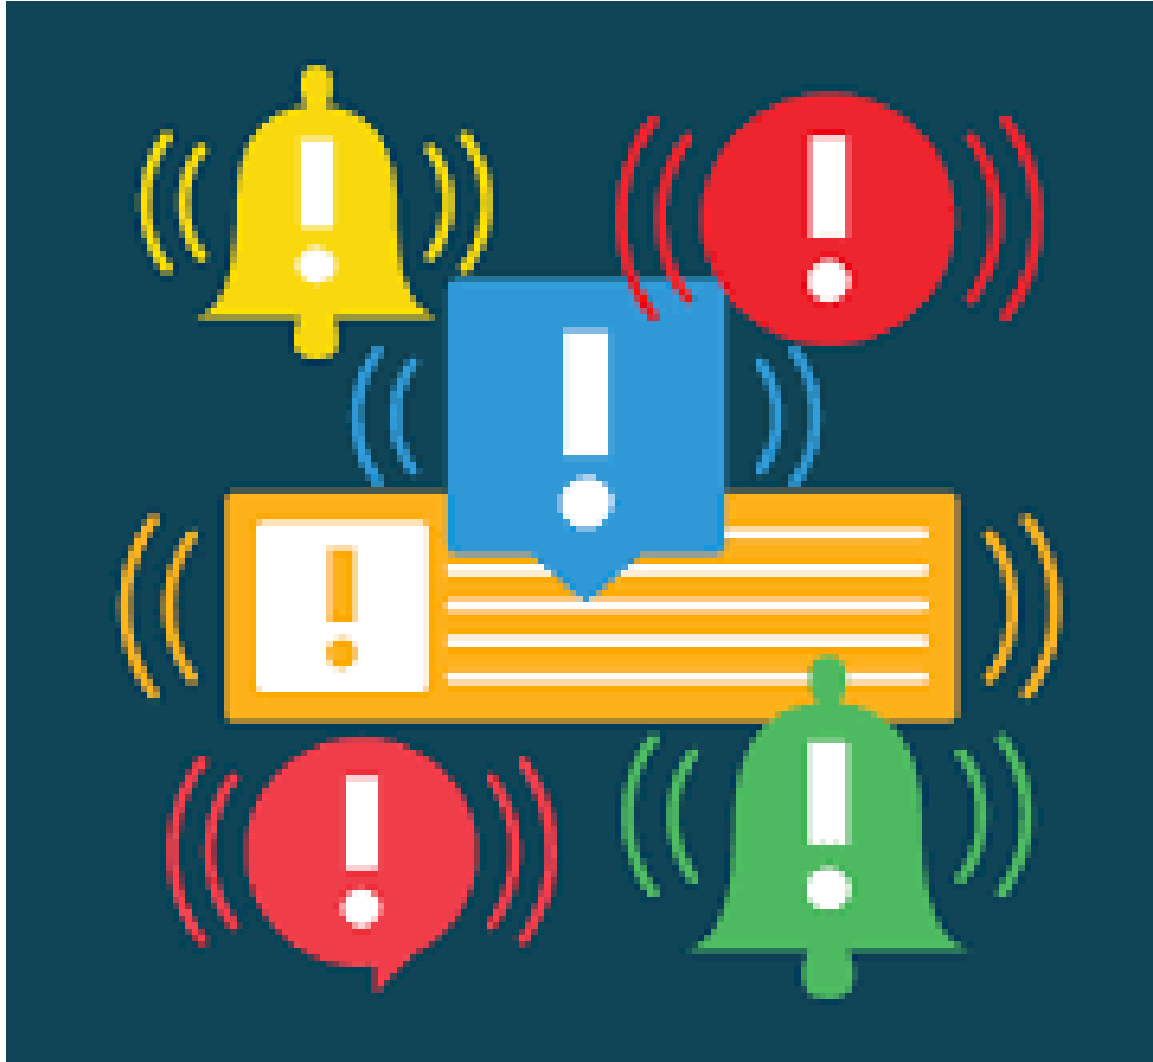

## Category #4: Notifications

---



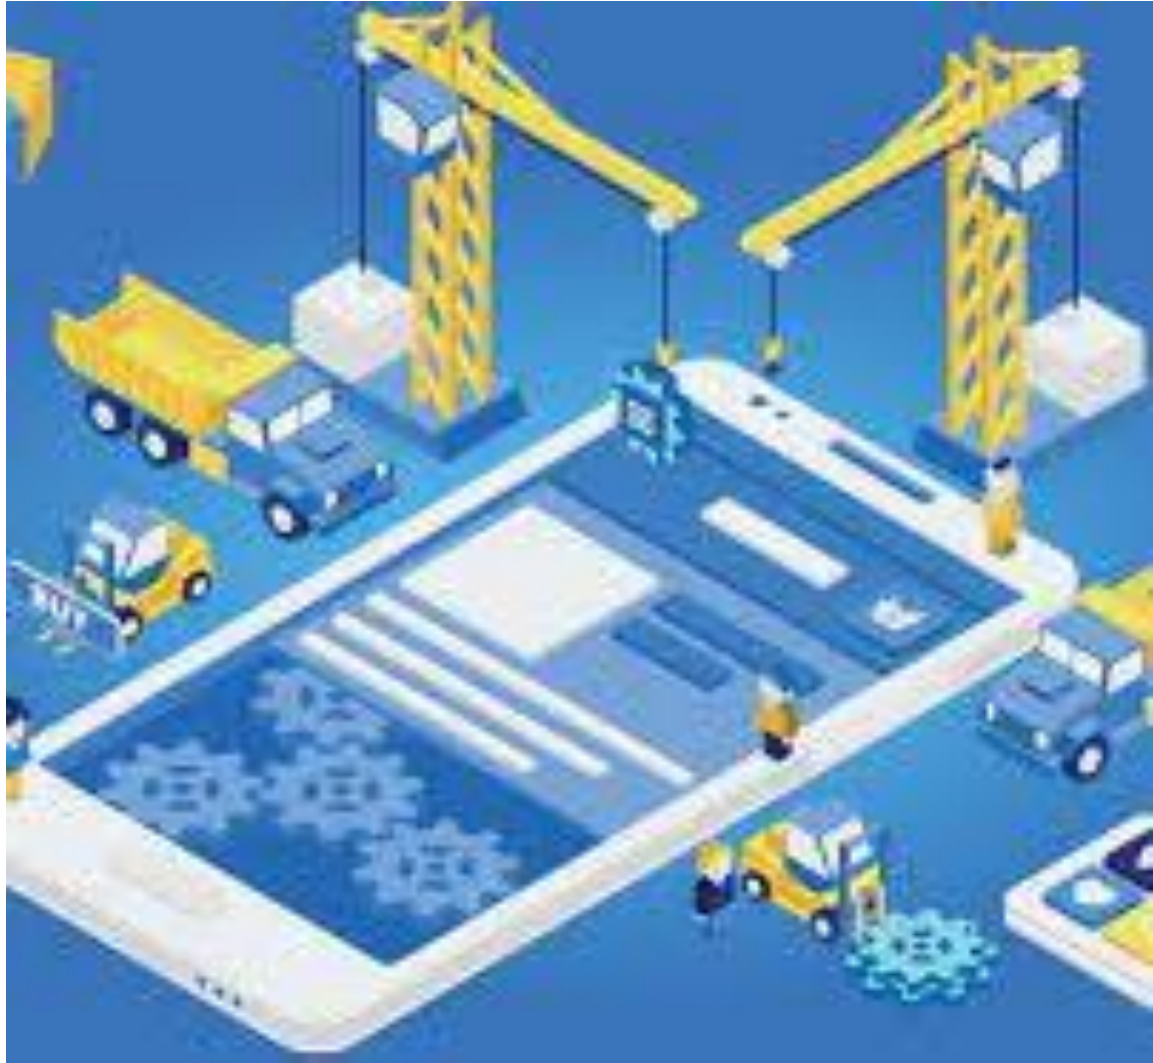

# Category #5: Customization

---

# Final Thoughts

---

What additional information would you like to see from a mobile app related to smoking cessation?

- More categories?

Have you used other apps to improve your health?

- Did you like using them? Why or why not?

Is there anything we missed?

**Thank you for your participation!**
